# Supplementary material for: Fungal Metabolites Antagonists towards Plant Pests and Human Pathogens: Structure-Activity Relationship Studies
Source: PubMed Central journal article supplement (PMC6017029; doi:10.3390/molecules23040834), 2018-04-05
Supplement: molecules-23-00834-s001.pdf [file molecules-23-00834-s001.pdf]

## SUPPLEMENTARY MATERIAL

# Fungal metabolites antagonists towards plant pests and human pathogens: structure-activity relationship studies

Marco Masi \*, Paola Nocera, Pierluigi Revegolia, Alessio Cimmino and Antonio Evidente

Dipartimento di Scienze Chimiche, Università di Napoli Federico II, Complesso Universitario monte Sant'Angelo, Via Cintia 4, 80126 Napoli, Italy; pierlugi.revegolia@unina.it; paola.nocera@unina.it; alessio.cimmino@unina.it; evidente@unina.it

\* Correspondence: marco.masi@unina.it; Tel.: +39-081-253-2126

### List of content

**Table S1.** Fungal metabolites, their hemisynthetic derivatives and biological activities.

**Table S1.** Fungal metabolites, their hemisynthetic derivatives and biological activities.

| Name and Number                | Class of Natural Compounds | Systematic Name                                                                                                                                                                                                                                             | Source                                           | Activity                                                      | Ref.                 |
|--------------------------------|----------------------------|-------------------------------------------------------------------------------------------------------------------------------------------------------------------------------------------------------------------------------------------------------------|--------------------------------------------------|---------------------------------------------------------------|----------------------|
| Sphaeropsidins A (1)           | pimarane diterpene         | (2 <i>R</i> ,4 <i>aR</i> ,4 <i>bR</i> ,8 <i>aS</i> ,9 <i>S</i> )-4 <i>a</i> ,9-dihydroxy-2,8,8-trimethyl-2-vinyl-4,4 <i>a</i> ,5,6,7,8,8 <i>a</i> ,9-octahydro-2 <i>H</i> -9,4 <i>b</i> -(epoxymethano)phenanthrene-10,12(3 <i>H</i> )-dione                | <i>Diplodia</i> spp.                             | antimycotic;<br>anticancer;<br>antibacterial;<br>insecticidal | [38,39,41-44, 63,78] |
| Sphaeropsidins B (2)           | pimarane diterpene         | (2 <i>R</i> ,4 <i>aR</i> ,4 <i>bR</i> ,8 <i>aS</i> ,9 <i>S</i> ,10 <i>R</i> )-4 <i>a</i> ,9,10-trihydroxy-2,8,8-trimethyl-2-vinyl-3,4,4 <i>a</i> ,5,6,7,8,8 <i>a</i> ,9,10-decahydro-2 <i>H</i> -9,4 <i>b</i> -(epoxymethano)phenanthren-12-one             | <i>Diplodia cupressi</i>                         | antimycotic;<br>phytotoxic;<br>insecticidal                   | [44,78]              |
| Sphaeropsidins C (3)           | pimarane diterpene         | (4 <i>aR</i> ,4 <i>bR</i> ,7 <i>R</i> ,10 <i>aS</i> )-4 <i>b</i> -hydroxy-1,1,7-trimethyl-9-oxo-7-vinyl-1,2,3,4,4 <i>a</i> ,4 <i>b</i> ,5,6,7,9,10,10 <i>a</i> -dodecahydrophenanthrene-4 <i>a</i> -carboxylic acid                                         | <i>D. cupressi</i>                               | antimycotic;<br>phytotoxic                                    | [44]                 |
| Sphaeropsidins D (4)           | pimarane diterpene         | (2 <i>R</i> ,4 <i>R</i> ,4 <i>aR</i> ,4 <i>bR</i> ,8 <i>aS</i> ,9 <i>S</i> )-4,4 <i>a</i> ,9-trihydroxy-2,8,8-trimethyl-2-vinyl-4,4 <i>a</i> ,5,6,7,8,8 <i>a</i> ,9-octahydro-2 <i>H</i> -9,4 <i>b</i> -(epoxymethano)phenanthrene-10,12(3 <i>H</i> )-dione | <i>D. cupressi</i>                               | Phytotoxic                                                    | [44]                 |
| Sphaeropsidins E (5)           | pimarane diterpene         | (4 <i>R</i> ,4 <i>aR</i> ,4 <i>bR</i> ,7 <i>R</i> ,9 <i>S</i> ,10 <i>R</i> ,10 <i>aS</i> )-1,1,4 <i>a</i> ,7-tetramethyl-7-vinyl-1,2,3,4,4 <i>a</i> ,4 <i>b</i> ,5,6,7,9,10,10 <i>a</i> -dodecahydrophenanthrene-4,4 <i>b</i> ,9,10-tetraol                 | <i>D. cupressi</i>                               |                                                               | [44]                 |
| Sphaeropsidins F (6)           | pimarane diterpene         | (1 <i>S</i> ,2 <i>R</i> ,4 <i>S</i> ,4 <i>bS</i> ,8 <i>aS</i> ,10 <i>R</i> )-1,2,4 <i>b</i> ,8,8-pentamethyl-2-vinyl-1,2,3,4,4 <i>b</i> ,5,6,7,8,8 <i>a</i> ,9,10-dodecahydrophenanthrene-4,10-diol                                                         | <i>D. cupressi</i>                               |                                                               | [44]                 |
| Sphaeropsidone (7)             | cyclohexanone              | (1 <i>S</i> ,5 <i>R</i> ,6 <i>S</i> )-5-hydroxy-4-methoxy-7-oxabicyclo[4.1.0]hept-3-en-2-one                                                                                                                                                                | <i>D. cupressi</i>                               | antioomycetes;<br>phytotoxic                                  | [45,100]             |
| <i>epi</i> -Sphaeropsidone (8) | cyclohexanone              | (1 <i>S</i> ,5 <i>S</i> ,6 <i>S</i> )-5-hydroxy-4-methoxy-7-oxabicyclo[4.1.0]hept-3-en-2-one                                                                                                                                                                | <i>D. cupressi</i><br><i>Diplodia africana</i>   | antioomycetes;<br>phytotoxic                                  | [45,100]             |
| Compound (9)                   | cyclohexanone              | (4 <i>S</i> ,6 <i>S</i> )-6-chloro-4,5-dihydroxy-3-methoxycyclohex-2-enone                                                                                                                                                                                  | <i>D. cupressi</i>                               |                                                               | [45,100]             |
| Compound (10)                  | cyclohexanone              | (4 <i>S</i> ,6 <i>R</i> )-6-chloro-4,5-dihydroxy-3-methoxycyclohex-2-enone                                                                                                                                                                                  | <i>D. cupressi</i>                               |                                                               | [45,100]             |
| Compound (11)                  | pimarane diterpene         | (2 <i>R</i> ,4 <i>aR</i> ,4 <i>bR</i> ,8 <i>aS</i> ,9 <i>S</i> )-4 <i>a</i> -hydroxy-2,8,8-trimethyl-10,12-dioxo-2-vinyl-3,4,4 <i>a</i> ,5,6,7,8,8 <i>a</i> ,9,10-decahydro-2 <i>H</i> -9,4 <i>b</i> -(epoxymethano)phenanthren-9-yl acetate                | hemisynthesized from <b>1</b><br>for SAR studies | phytotoxic;<br>antimycotic                                    | [44,63,78]           |
| Compound (12)                  | pimarane diterpene         | (2 <i>R</i> ,4 <i>bR</i> ,8 <i>aS</i> ,9 <i>S</i> )-2,8,8-trimethyl-10,12-dioxo-2-vinyl-2,3,4,5,6,7,8,8 <i>a</i> ,9,10-decahydro-1 <i>H</i> -9,4 <i>b</i> -(epoxymethano)phenanthrene-1,9-diyl diacetate                                                    | hemisynthesized from <b>1</b><br>for SAR studies |                                                               | [44,63]              |
| Compound (13)                  | pimarane diterpene         | (2 <i>S</i> ,4 <i>aR</i> ,4 <i>bR</i> ,8 <i>aS</i> ,9 <i>S</i> )-2-ethyl-4 <i>a</i> ,9-dihydroxy-2,8,8-trimethyl-4,4 <i>a</i> ,5,6,7,8,8 <i>a</i> ,9-octahydro-2 <i>H</i> -9,4 <i>b</i> -(epoxymethano)phenanthrene-10,12(3 <i>H</i> )-dione                | hemisynthesized from <b>1</b><br>for SAR studies |                                                               | [44,63]              |
| Compound (14)                  | pimarane diterpene         | (3 <i>R</i> ,3 <i>aS</i> ,4 <i>aR</i> ,6 <i>aS</i> ,10 <i>aR</i> ,10 <i>bR</i> )-methyl 10 <i>b</i> -hydroxy-3,7,7-trimethyl-5,6-dioxo-3-vinyltetradecahydrocyclopropa[ <i>j</i> ]phenanthrene-10 <i>a</i> -                                                | hemisynthesized from <b>1</b><br>for SAR studies |                                                               | [44,63,78]           |

|                               |                    |                                                                                                                                                            |                                        |                                       |          |
|-------------------------------|--------------------|------------------------------------------------------------------------------------------------------------------------------------------------------------|----------------------------------------|---------------------------------------|----------|
|                               |                    | carboxylate                                                                                                                                                |                                        |                                       |          |
| Compound (15)                 | pimarane diterpene | (1R,3a'S,4R,7a'R)-2-formyl-4,4',4'-trimethyl-3'-oxo-4-vinyl-3a',4',5',6',7',7a'-hexahydro-3'H-spiro[cyclohex[2]ene-1,1'-isobenzofuran]-7a'-carboxylic acid | hemisynthesized from 2 for SAR studies |                                       | [44,63]  |
| Compound (16)                 | pimarane diterpene | (4aR,4bR,7R,9S,10aS)-4b,9-dihydroxy-1,1,7-trimethyl-7-vinyl-1,2,3,4,4a,4b,5,6,7,9,10,10a-dodecahydrophenanthrene-4a-carboxylic acid                        | hemisynthesized from 3 for SAR studies |                                       | [44,63]  |
| Compound (17)                 | pimarane diterpene | (3R,3aS,4aR,6aS,10aR,10bR)-methyl 10b-hydroxy-3,7,7-trimethyl-5-oxo-3-vinyltetradecahydrocyclopropa[j]phenanthrene-10a-carboxylate                         | hemisynthesized from 3 for SAR studies |                                       | [44,63]  |
| Compound (18)                 | pimarane diterpene | (4aR,4bR,7R,10aS)-methyl 4b-hydroxy-1,1,7-trimethyl-9-oxo-7-vinyl-1,2,3,4,4a,4b,5,6,7,9,10,10a-dodecahydrophenanthrene-4a-carboxylate                      | hemisynthesized from 3 for SAR studies |                                       | [44,63]  |
| Compound (19)                 | cyclohexanone      | (1S,2R,6S)-3-methoxy-5-oxo-7-oxabicyclo[4.1.0]hept-3-en-2-yl acetate                                                                                       | hemisynthesized from 7 for SAR studies |                                       | [45,100] |
| Compound (20)                 | aromatic compound  | 5-methoxybenzene-1,2,4-triyl triacetate                                                                                                                    | hemisynthesized from 7 for SAR studies |                                       | [45,100] |
| Compound (21)                 | cyclohexandione    | (1R,6S)-3-methoxy-7-oxabicyclo[4.1.0]hept-3-ene-2,5-dione                                                                                                  | hemisynthesized from 7 for SAR studies | antioomycetes                         | [45,100] |
| Compound (22)                 | cyclohexanone      | (4R,5S,6R)-6-bromo-4,5-dihydroxy-3-methoxycyclohex-2-enone                                                                                                 | hemisynthesized from 7 for SAR studies |                                       | [45,100] |
| Compound (23)                 | cyclohexandiol     | (1S,2R,5R,6R)-3-methoxy-7-oxabicyclo[4.1.0]hept-3-ene-2,5-diol                                                                                             | hemisynthesized from 7 for SAR studies |                                       | [45,100] |
| Compound (24)                 | cyclohexanone      | (2S,4R,5S)-2,4-dihydroxy-5-methoxycyclohexanone                                                                                                            | hemisynthesized from 7 for SAR studies |                                       | [45,100] |
| Compound (25)                 | cyclohexanone      | (1S,2S,6S)-3-methoxy-5-oxo-7-oxabicyclo[4.1.0]hept-3-en-2-yl acetate                                                                                       | hemisynthesized from 8 for SAR studies | antioomycetes                         | [45,100] |
| Compound (26)                 | cyclohexanone      | (1R,2S,3S)-4-methoxy-6-oxocyclohex-4-ene-1,2,3-triyl triacetate                                                                                            | hemisynthesized from 8 for SAR studies |                                       | [45,100] |
| Afritoxinone A (27)           | pyranone           | (3aS,6R,7aS)-6-methoxy-3,3a,6,7a-tetrahydro-2H-furo[2,3-b]pyran-2-one                                                                                      | <i>D. africana</i>                     | phytotoxic                            | [34]     |
| Afritoxinone B (28)           | pyranone           | (3aR,6R,7aS)-6-methoxy-3,3a,6,7a-tetrahydro-2H-furo[2,3-b]pyran-2-one                                                                                      | <i>D. africana</i>                     | phytotoxic                            | [34]     |
| Oxysporone (29)               | pyranone           | (3aR,4S,7aR)-4-hydroxy-3,3a,4,7a-tetrahydro-2H-furo[2,3-b]pyran-2-one                                                                                      | <i>D. africana</i>                     | phytotoxic; antioomycetes; antifungal | [34, 46] |
| R-(-)-Mellein (30)            | isocoumarin        | (R)-8-hydroxy-3-methylisochroman-1-one                                                                                                                     | <i>D. africana</i>                     | phytotoxicity                         | [34]     |
| (3R,4R)-4-Hydroxymellein (31) | isocoumarin        | (3R,4R)-4,8-dihydroxy-3-methylisochroman-1-one                                                                                                             | <i>D. africana</i>                     | phytotoxicity                         | [34]     |
| (3R,4S)-4-Hydroxymellein (32) | isocoumarin        | (3R,4S)-4,8-dihydroxy-3-methylisochroman-1-one                                                                                                             | <i>D. africana</i>                     | phytotoxicity                         | [34]     |
| Compound (33)                 | pyranone           | (3aR,4S,7aR)-2-oxo-3,3a,4,7a-tetrahydro-2H-furo[2,3-                                                                                                       | hemisynthesized from                   |                                       | [46]     |

|                      |              |                                                                                                                                                                                               |                                                |                              |      |
|----------------------|--------------|-----------------------------------------------------------------------------------------------------------------------------------------------------------------------------------------------|------------------------------------------------|------------------------------|------|
|                      |              | b]pyran-4-yl acetate                                                                                                                                                                          | <b>29</b> for SAR studies                      |                              |      |
| Compound (34)        | pyranone     | (3aR,4S,7aR)-2-oxohexahydro-2H-furo[2,3-b]pyran-4-yl acetate                                                                                                                                  | hemisynthesized from <b>29</b> for SAR studies |                              | [46] |
| Compound (35)        | pyranone     | (3aR,4S)-2-oxo-3,3a,4,7a-tetrahydro-2H-furo[2,3-b]pyran-4-yl 4-bromobenzoate                                                                                                                  | hemisynthesized from <b>29</b> for SAR studies | antioomycetes;<br>antifungal | [46] |
| Compound (36)        | pyranone     | (3aS,7aR)-3,3a-dihydro-2H-furo[2,3-b]pyran-2,4(7aH)-dione                                                                                                                                     | hemisynthesized from <b>29</b> for SAR studies |                              | [46] |
| Compound (37)        | pyranone     | (3aR,4S,7aR)-4-hydroxyhexahydro-2H-furo[2,3-b]pyran-2-one                                                                                                                                     | hemisynthesized from <b>29</b> for SAR studies |                              | [46] |
| Compound (38)        | pyrane       | (S)-2-(4-hydroxy-3,4-dihydro-2H-pyran-5-yl)acetic acid                                                                                                                                        | hemisynthesized from <b>29</b> for SAR studies |                              | [46] |
| Compound (39)        | pyrane       | (S)-2-(4-hydroxy-4H-pyran-3-yl)acetic acid                                                                                                                                                    | hemisynthesized from <b>29</b> for SAR studies |                              | [46] |
| Compound (40)        | pyrane       | (S)-methyl 2-(4-hydroxy-4H-pyran-3-yl)acetate                                                                                                                                                 | hemisynthesized from <b>29</b> for SAR studies |                              | [46] |
| Ascochalasin (41)    | cytochalasan | (3S,4S,6S,10R,14R,17aR)-3-benzyl-6,14-dihydroxy-4,10-dimethyl-5-methylene-3,3a,4,5,6,6a,9,10,11,12,13,14,15,16-tetradecahydro-1H-cyclotrideca[d]isoindole-1,17(2H)-dione                      | <i>Ascochyta heteromorpha</i>                  |                              | [51] |
| Deoxaphomin (42)     | cytochalasan | (3S,4S,6S,7E,10R,14R,15E,17aR)-3-benzyl-6-hydroxy-4,10,14-trimethyl-5-methylene-3,3a,4,5,6,6a,9,10,11,12,13,14-dodecahydro-1H-cyclotrideca[d]isoindole-1,17(2H)-dione                         | <i>A. heteromorpha</i>                         |                              | [51] |
| Cytochalasins A (43) | cytochalasan | (3S,4S,6S,7E,10R,15E,18aS)-3-benzyl-6-hydroxy-4,10-dimethyl-5-methylene-3,3a,4,5,6,6a,10,11,12,13-dodecahydro-1H-[1]oxacyclotetradecino[2,3-d]isoindole-1,14,17(2H,9H)-trione                 | <i>A. heteromorpha</i>                         | antifungal,<br>antibacterial | [51] |
| Cytochalasins B (44) | cytochalasan | (3S,4S,6S,7E,10R,14R,15E,18aS)-3-benzyl-6,14-dihydroxy-4,10-dimethyl-5-methylene-3,3a,4,5,6,6a,9,10,11,12,13,14-dodecahydro-1H-[1]oxacyclotetradecino[2,3-d]isoindole-1,17(2H)-dione          | <i>A. heteromorpha</i>                         |                              | [51] |
| Compound (45)        | cytochalasan | (3S,4S,6S,7E,10R,14R,15E,18aS)-3-benzyl-4,10-dimethyl-5-methylene-1,17-dioxo-2,3,3a,4,5,6,6a,9,10,11,12,13,14,17-tetradecahydro-1H-[1]oxacyclotetradecino[2,3-d]isoindole-6,14-diyl diacetate | hemisynthesized from <b>44</b> for SAR studies |                              | [51] |
| Compound (46)        | cytochalasan | (3S,4S,6S,10R,14R,18aS)-3-benzyl-6,14-dihydroxy-4,10-dimethyl-5-methylene-3,3a,4,5,6,6a,9,10,11,12,13,14,15,16-tetradecahydro-1H-[1]oxacyclotetradecino[2,3-d]isoindole-1,17(2H)-dione        | hemisynthesized from <b>44</b> for SAR studies |                              | [51] |

|                                               |                                  |                                                                                                                                                                                                                                                                                                                                                                     |                                                |               |      |
|-----------------------------------------------|----------------------------------|---------------------------------------------------------------------------------------------------------------------------------------------------------------------------------------------------------------------------------------------------------------------------------------------------------------------------------------------------------------------|------------------------------------------------|---------------|------|
| Compound (47)                                 | cytochalasan                     | (3 <i>S</i> ,4 <i>S</i> ,6 <i>S</i> ,7 <i>E</i> ,10 <i>R</i> ,15 <i>E</i> ,18 <i>aS</i> )-3-benzyl-4,10-dimethyl-5-methylene-1,14,17-trioxo-2,3,3 <i>a</i> ,4,5,6,6 <i>a</i> ,9,10,11,12,13,14,17-tetradecahydro-1 <i>H</i> -[1]oxacyclotetradecino[2,3- <i>d</i> ]isoindol-6-yl acetate                                                                            | hemisynthesized from <b>43</b> for SAR studies | antibacterial | [51] |
| Cytochalasins C (48)                          | cytochalasan                     | (3 <i>S</i> ,6 <i>S</i> ,7 <i>E</i> ,10 <i>S</i> ,12 <i>R</i> ,13 <i>E</i> ,15 <i>R</i> )-3-benzyl-6,12-dihydroxy-4,5,10,12-tetramethyl-1,11-dioxo-2,3,3 <i>a</i> ,6,6 <i>a</i> ,9,10,11,12,15-decahydro-1 <i>H</i> -cycloundeca[ <i>d</i> ]isoindol-15-yl acetate                                                                                                  | <i>A. heteromorpha</i>                         |               | [51] |
| Cytochalasins D (49)                          | cytochalasan                     | (3 <i>S</i> ,6 <i>S</i> ,7 <i>E</i> ,10 <i>S</i> ,12 <i>R</i> ,13 <i>E</i> ,15 <i>R</i> )-3-benzyl-6,12-dihydroxy-4,5,10,12-tetramethyl-1,11-dioxo-2,3,3 <i>a</i> ,6,6 <i>a</i> ,9,10,11,12,15-decahydro-1 <i>H</i> -cycloundeca[ <i>d</i> ]isoindol-15-yl acetate                                                                                                  | <i>A. heteromorpha</i>                         |               | [51] |
| Cytochalasins E (50)                          | cytochalasan                     | (1 <i>E</i> ,4 <i>S</i> ,6 <i>R</i> ,7 <i>E</i> ,11 <i>aS</i> ,14 <i>S</i> ,15 <i>S</i> ,15 <i>aR</i> ,16 <i>aS</i> )-14-benzyl-6-hydroxy-4,6,15,15 <i>a</i> -tetramethyl-3,4,14,14 <i>a</i> ,15,15 <i>a</i> ,16 <i>a</i> ,16 <i>b</i> -octahydro-[1,3]dioxacyclotridecino[4,5- <i>d</i> ]oxireno[2,3- <i>f</i> ]isoindole-5,10,12(6 <i>H</i> ,13 <i>H</i> )-trione | <i>A. heteromorpha</i>                         |               | [51] |
| Cytochalasins H (51)                          | cytochalasan                     | (3 <i>S</i> ,6 <i>S</i> ,7 <i>E</i> ,10 <i>S</i> ,12 <i>R</i> ,13 <i>E</i> ,15 <i>R</i> )-3-benzyl-6,12-dihydroxy-4,5,10,12-tetramethyl-1-oxo-2,3,3 <i>a</i> ,6,6 <i>a</i> ,9,10,11,12,15-decahydro-1 <i>H</i> -cycloundeca[ <i>d</i> ]isoindol-15-yl acetate                                                                                                       | <i>A. heteromorpha</i>                         |               | [51] |
| Cytochalasins J (52)                          | cytochalasan                     | (3 <i>S</i> ,6 <i>S</i> ,7 <i>E</i> ,10 <i>S</i> ,12 <i>R</i> ,13 <i>E</i> ,15 <i>R</i> )-3-benzyl-6,12,15-trihydroxy-4,5,10,12-tetramethyl-2,3,3 <i>a</i> ,6,6 <i>a</i> ,9,10,11,12,15-decahydro-1 <i>H</i> -cycloundeca[ <i>d</i> ]isoindol-1-one                                                                                                                 | <i>A. heteromorpha</i>                         |               | [51] |
| 12β-Hydroxy-13α-methoxyverruculogen TR-2 (53) | indole diketopiperazine alkaloid | (5 <i>aS</i> ,6 <i>S</i> ,12 <i>S</i> ,14 <i>aS</i> )-5 <i>a</i> -hydroxy-12-(3-hydroxy-3-methylbutyl)-6,9-dimethoxy-1,2,3,5 <i>a</i> ,6,14 <i>a</i> -hexahydropyrrolo[1'',2'':4',5']pyrazino[1',2':1,6]pyrido[3,4- <i>b</i> ]indole-5,14(11 <i>H</i> ,12 <i>H</i> )-dione                                                                                          | <i>Aspergillus fumigatus</i> LN-4              |               | [52] |
| 3-Hydroxyfumiquinazoline A (54)               | fumiquinazoline                  | (1 <i>R</i> ,4 <i>R</i> )-1-hydroxy-4-(((2 <i>S</i> ,9 <i>S</i> ,9 <i>aS</i> )-9-hydroxy-2-methyl-3-oxo-2,3,9,9 <i>a</i> -tetrahydro-1 <i>H</i> -imidazo[1,2- <i>a</i> ]indol-9-yl)methyl)-1-methyl-1 <i>H</i> -pyrazino[2,1- <i>b</i> ]quinazoline-3,6(2 <i>H</i> ,4 <i>H</i> )-dione                                                                              | <i>A. fumigatus</i> LN-4                       |               | [52] |
| Fumitremorgin C (55)                          | indole diketopiperazine alkaloid | (5 <i>aR</i> ,6 <i>S</i> ,12 <i>S</i> ,14 <i>aS</i> )-5 <i>a</i> ,6-dihydroxy-9-methoxy-12-(3-methylbut-2-en-1-yl)-1,2,3,5 <i>a</i> ,6,14 <i>a</i> -hexahydropyrrolo[1'',2'':4',5']pyrazino[1',2':1,6]pyrido[3,4- <i>b</i> ]indole-5,14(11 <i>H</i> ,12 <i>H</i> )-dione                                                                                            | <i>A. fumigatus</i> LN-4                       |               | [52] |
| Cyclotryprostatins A (56)                     | indole diketopiperazine alkaloid | (5 <i>aS</i> ,6 <i>S</i> ,12 <i>S</i> ,14 <i>aS</i> )-5 <i>a</i> ,6-dihydroxy-9-methoxy-12-(3-methylbut-2-en-1-yl)-1,2,3,5 <i>a</i> ,6,14 <i>a</i> -hexahydropyrrolo[1'',2'':4',5']pyrazino[1',2':1,6]pyrido[3,4- <i>b</i> ]indole-5,14(11 <i>H</i> ,12 <i>H</i> )-dione                                                                                            | <i>A. fumigatus</i> LN-4                       |               | [52] |
| Cyclotryprostatins B (57)                     | indole diketopiperazine alkaloid | (5 <i>aS</i> ,6 <i>S</i> ,12 <i>S</i> ,14 <i>aS</i> )-5 <i>a</i> -hydroxy-6,9-dimethoxy-12-(3-methylbut-2-en-1-yl)-1,2,3,5 <i>a</i> ,6,14 <i>a</i> -                                                                                                                                                                                                                | <i>A. fumigatus</i> LN-4                       |               | [52] |

|                                       |                                  |                                                                                                                                                                                                                                                                                                                                                                                 |                                            |                  |          |
|---------------------------------------|----------------------------------|---------------------------------------------------------------------------------------------------------------------------------------------------------------------------------------------------------------------------------------------------------------------------------------------------------------------------------------------------------------------------------|--------------------------------------------|------------------|----------|
|                                       |                                  | hexahydropyrrolo[1'',2'':4',5']pyrazino[1',2':1,6]pyrid<br>o[3,4-b]indole-5,14(11 <i>H</i> ,12 <i>H</i> )-dione                                                                                                                                                                                                                                                                 |                                            |                  |          |
| Verruculogen TR-2 (58)                | indole diketopiperazine alkaloid | (5 <i>aR</i> ,6 <i>S</i> ,12 <i>S</i> ,14 <i>aS</i> )-5 <i>a</i> ,6-dihydroxy-12-(3-hydroxy-3-<br>methylbutyl)-9-methoxy-1,2,3,5 <i>a</i> ,6,14 <i>a</i> -<br>hexahydropyrrolo[1'',2'':4',5']pyrazino[1',2':1,6]pyrid<br>o[3,4-b]indole-5,14(11 <i>H</i> ,12 <i>H</i> )-dione                                                                                                   | <i>A. fumigatus</i> LN-4                   |                  | [64]     |
| 12β-Hydroxyverruculogen TR-<br>2 (59) | indole diketopiperazine alkaloid | (5 <i>aS</i> ,6 <i>S</i> ,12 <i>S</i> ,14 <i>aS</i> )-5 <i>a</i> ,6-dihydroxy-12-(3-hydroxy-3-<br>methylbutyl)-9-methoxy-1,2,3,5 <i>a</i> ,6,14 <i>a</i> -<br>hexahydropyrrolo[1'',2'':4',5']pyrazino[1',2':1,6]pyrid<br>o[3,4-b]indole-5,14(11 <i>H</i> ,12 <i>H</i> )-dione                                                                                                   | <i>A. fumigatus</i> LN-4                   |                  | [64]     |
| Fumitremorgin B (60)                  | indole diketopiperazine alkaloid | (5 <i>aR</i> ,6 <i>S</i> ,12 <i>S</i> ,14 <i>aS</i> )-5 <i>a</i> ,6-dihydroxy-9-methoxy-11-(3-<br>methylbut-2-en-1-yl)-12-(2-methylprop-1-en-1-yl)-<br>1,2,3,5 <i>a</i> ,6,14 <i>a</i> -<br>hexahydropyrrolo[1'',2'':4',5']pyrazino[1',2':1,6]pyrid<br>o[3,4-b]indole-5,14(11 <i>H</i> ,12 <i>H</i> )-dione                                                                     | <i>A. fumigatus</i> LN-4                   |                  | [64]     |
| Verruculogen (61)                     | indole diketopiperazine alkaloid | (5 <i>R</i> ,10 <i>S</i> ,10 <i>aR</i> ,14 <i>aS</i> ,15 <i>bS</i> )-10,10 <i>a</i> -dihydroxy-7-<br>methoxy-2,2-dimethyl-5-(2-methylprop-1-en-1-yl)-<br>1,10,10 <i>a</i> ,12,13,14,14 <i>a</i> ,15 <i>b</i> -octahydro-3,4-dioxo-<br>5 <i>a</i> ,11 <i>a</i> ,15 <i>a</i> -triazacycloocta[ <i>l</i> m]indeno[5,6- <i>b</i> ]fluorene-<br>11,15(2 <i>H</i> ,5 <i>H</i> )-dione | <i>A. fumigatus</i> LN-4                   |                  | [64]     |
| Fumiquinazoline F (62)                | fumiquinazoline                  | (1 <i>R</i> ,4 <i>R</i> )-4-((1 <i>H</i> -indol-2-yl)methyl)-1-methyl-1 <i>H</i> -<br>pyrazino[2,1- <i>b</i> ]quinazoline-3,6(2 <i>H</i> ,4 <i>H</i> )-dione                                                                                                                                                                                                                    | <i>A. fumigatus</i> LN-4                   |                  | [64]     |
| Fumiquinazoline G (63)                | fumiquinazoline                  | (1 <i>S</i> ,4 <i>R</i> )-4-((1 <i>H</i> -indol-2-yl)methyl)-1-methyl-1 <i>H</i> -<br>pyrazino[2,1- <i>b</i> ]quinazoline-3,6(2 <i>H</i> ,4 <i>H</i> )-dione                                                                                                                                                                                                                    | <i>A. fumigatus</i> LN-4                   |                  | [64]     |
| Fumiquinazoline D (64)                | fumiquinazoline                  | (1 <i>S</i> ,2 <i>a</i> ,1 <i>S</i> ,6 <i>bS</i> ,8 <i>R</i> ,15 <i>R</i> )-6 <i>b</i> -hydroxy-1,15-dimethyl-<br>6 <i>b</i> ,7,8,15-tetrahydro-2 <i>a</i> ,8 <i>a</i> ,14,15 <i>a</i> ,16-pentaaza-8,15-<br>ethanobenzo[4',5']pentaleno[1',6':4,5,6]cycloocta[1,2-<br><i>b</i> ]naphthalene-2,9,17(1 <i>H</i> ,2 <i>a</i> 1 <i>H</i> )-trione                                  | <i>A. fumigatus</i> LN-4                   |                  | [64]     |
| Fumiquinazoline A (65)                | fumiquinazoline                  | (1 <i>S</i> ,4 <i>R</i> )-4-(((2 <i>S</i> ,9 <i>S</i> ,9 <i>aS</i> )-9-hydroxy-2-methyl-3-oxo-<br>2,3,9,9 <i>a</i> -tetrahydro-1 <i>H</i> -imidazo[1,2- <i>a</i> ]indol-9-<br>yl)methyl)-1-methyl-1 <i>H</i> -pyrazino[2,1- <i>b</i> ]quinazoline-<br>3,6(2 <i>H</i> ,4 <i>H</i> )-dione                                                                                        | <i>A. fumigatus</i> LN-4                   |                  | [64]     |
| Fusapyrone (66)                       | substituted pyrone               | 3-((2 <i>R</i> ,3 <i>R</i> ,4 <i>R</i> ,6 <i>R</i> )-3,4-dihydroxy-6-<br>(hydroxymethyl)tetrahydro-2 <i>H</i> -pyran-2-yl)-4-<br>hydroxy-6-((4 <i>E</i> ,6 <i>E</i> ,9 <i>Z</i> )-3-hydroxy-8-<br>(hydroxymethyl)-2,6,10,12-tetramethyloctadeca-<br>4,6,9-trien-2-yl)-2 <i>H</i> -pyran-2-one                                                                                   | <i>Fusarium semitectum</i>                 | antifungal       | [53, 54] |
| Deoxyfusapyrone (67)                  | substituted pyrone               | 3-((2 <i>S</i> ,6 <i>S</i> )-6-methyltetrahydro-2 <i>H</i> -pyran-2-yl)-6-<br>(4 <i>E</i> ,6 <i>E</i> ,9 <i>Z</i> )-2,6,8,10,12-pentamethyloctadeca-4,6,9-<br>trien-2-yl)-2 <i>H</i> -pyran-2-one                                                                                                                                                                               | hemisynthesized from<br>66 for SAR studies | high zootoxicity | [53, 54] |
| Compound (68)                         | substituted pyrone               | ( <i>Z</i> )-2-((1 <i>E</i> ,3 <i>E</i> )-5-acetyl-6-(4-acetyl-3-((2 <i>S</i> ,4 <i>R</i> ,6 <i>R</i> )-4-<br>acetyl-6-(2-oxopropyl)tetrahydro-2 <i>H</i> -pyran-2-yl)-2-                                                                                                                                                                                                       | hemisynthesized from<br>66 for SAR studies |                  | [55]     |

|                                         |                      |                                                                                                                                                                                                   |                                                                            |                                         |         |
|-----------------------------------------|----------------------|---------------------------------------------------------------------------------------------------------------------------------------------------------------------------------------------------|----------------------------------------------------------------------------|-----------------------------------------|---------|
|                                         |                      | oxo-2H-pyran-6-yl)-2,6-dimethylhepta-1,3-dien-1-yl)-4,6-dimethyldodec-3-en-1-yl acetate                                                                                                           |                                                                            |                                         |         |
| Compound (69)                           | substituted pyrone   | 4-acetyl-6-((4E,6E,9Z)-3-acetyl-2,6,8,10,12-pentamethyloctadeca-4,6,9-trien-2-yl)-3-((2S,4R,6R)-4-acetyl-6-(2-oxopropyl)tetrahydro-2H-pyran-2-yl)-2H-pyran-2-one                                  | hemisynthesized from <b>67</b> for SAR studies                             |                                         | [55]    |
| Compound (70)                           | substituted pyrone   | (4E,6E)-3-(2-(4-acetyl-3-((2S,4R,6S)-4-acetyl-6-ethyltetrahydro-2H-pyran-2-yl)-2-oxo-2H-pyran-6-yl)propan-2-yl)-8-((Z)-2,4-dimethyldec-1-en-1-yl)-6-methylundeca-4,6-diene-2,10-dione             | hemisynthesized from <b>66</b> for SAR studies                             |                                         | [55]    |
| Compound (71)                           | substituted pyrone   | (2R,3R,4R,6R)-2-(6-((4E,6E,9Z)-3-acetoxy-8-(acetoxymethyl)-2,6,10,12-tetramethyloctadeca-4,6,9-trien-2-yl)-2-methoxy-4-oxo-4H-pyran-3-yl)-6-(acetoxymethyl)tetrahydro-2H-pyran-3,4-diyl diacetate | hemisynthesized from <b>66</b> for SAR studies                             |                                         | [55]    |
| Compound (72)                           | substituted pyrone   | 3-((2S,6S)-6-ethyltetrahydro-2H-pyran-2-yl)-4-hydroxy-6-((4E,6E,9Z)-8-(hydroxymethyl)-2,6,10,12-tetramethyloctadeca-4,6,9-trien-2-yl)-2H-pyran-2-one                                              | hemisynthesized from <b>66</b> for SAR studies                             | weak activity against <i>B. cinerea</i> | [55]    |
| Compound (73)                           | substituted pyrone   | 4-hydroxy-6-((4E,6E,9Z)-3-hydroxy-8-(hydroxymethyl)-2,6,10,12-tetramethyloctadeca-4,6,9-trien-2-yl)-3-(2-hydroxyethyl)-2H-pyran-2-one                                                             | hemisynthesized from <b>66</b> for SAR studies                             |                                         | [55]    |
| Compound (74)                           | substituted pyrone   | 3-((2R,3R,4R,6R)-3,4-dihydroxy-6-(hydroxymethyl)tetrahydro-2H-pyran-2-yl)-4-hydroxy-6-((Z)-3-hydroxy-8-(hydroxymethyl)-2,6,10,12-tetramethyloctadec-9-en-2-yl)-2H-pyran-2-one                     | hemisynthesized from <b>66</b> for SAR studies                             | weak activity against <i>B. cinerea</i> | [55]    |
| Compound (75)                           | substituted pyrone   | 3-((2R,3R,4R,6R)-3,4-dihydroxy-6-(hydroxymethyl)tetrahydro-2H-pyran-2-yl)-4-hydroxy-6-(3-hydroxy-8-(hydroxymethyl)-2,6,10,12-tetramethyloctadecan-2-yl)-2H-pyran-2-one                            | hemisynthesized from <b>66</b> for SAR studies                             | weak activity against <i>B. cinerea</i> | [55]    |
| 6- <i>n</i> -Pentyl-2H-pyran-2-one (76) | substituted pyrone   | 6-pentyl-2H-pyran-2-one                                                                                                                                                                           | <i>Trichoderma</i> spp.                                                    | antifungal                              | [55,56] |
| Viridepyronone (77)                     | substituted pyrone   | 6-(4-oxopentyl)-2H-pyran-2-one                                                                                                                                                                    | <i>Trichoderma viride</i>                                                  | antifungal                              | [57]    |
| Fusaproliferin (78)                     | macrocyclic compound | (S)-2-((3aS,5E,9Z,13R,14E,16aR)-2,13-dihydroxy-3a,6,10,14-tetramethyl-3-oxo-3,3a,4,7,8,11,12,13,16,16a-decahydrocyclopenta[15]annulen-1-yl)propyl acetate                                         | <i>Cleistothelobolus nipigonensis</i> and <i>Neogymnomycetes virgineus</i> | antifungal                              | [58]    |
| Terpestacin (79)                        | macrocyclic compound | (3aR,5E,7R,10Z,14E,16aS)-2,7-dihydroxy-3-((S)-1-hydroxypropan-2-yl)-6,10,14,16a-tetramethyl-3a,4,8,9,12,13,16,16a-octahydrocyclopenta[15]annulen-1(7H)-one                                        | <i>C. nipigonensis</i> and <i>N. virgineus</i>                             | antifungal                              | [59]    |
| Compound (80)                           | macrocyclic compound | (3aR,5E,7R,10Z,14E,16aS)-3-((S)-1-acetoxypropan-2-                                                                                                                                                | hemisynthesized from                                                       |                                         | [59]    |

|               |                      |                                                                                                                                                                                        |                                         |            |      |
|---------------|----------------------|----------------------------------------------------------------------------------------------------------------------------------------------------------------------------------------|-----------------------------------------|------------|------|
|               |                      | yl)-6,10,14,16a-tetramethyl-1-oxo-1,3a,4,7,8,9,12,13,16,16a-decahydrocyclopenta[15]annulene-2,7-diyl diacetate                                                                         | 78 for SAR studies                      |            |      |
| Compound (81) | macrocyclic compound | (S)-2-((3aS,5E,9Z,13R,14E,16aR)-13-hydroxy-2-methoxy-3a,6,10,14-tetramethyl-3-oxo-3,3a,4,7,8,11,12,13,16,16a-decahydrocyclopenta[15]annulen-1-yl)propyl acetate                        | hemisynthesized from 78 for SAR studies |            | [59] |
| Compound (82) | macrocyclic compound | (2S)-2-((3aS,13R,16aR)-2,13-dihydroxy-3a,6,10,14-tetramethyl-3-oxo-3,3a,4,5,6,7,8,9,10,11,12,13,14,15,16,16a-hexadecahydrocyclopenta[15]annulen-1-yl)propyl acetate                    | hemisynthesized from 78 for SAR studies |            | [59] |
| Compound (83) | macrocyclic compound | (S)-2-((3aS,5E,9Z,13R,14E,16aR)-2-((1-(4-bromophenoxy)vinyl)oxy)-13-hydroxy-3a,6,10,14-tetramethyl-3-oxo-3,3a,4,7,8,11,12,13,16,16a-decahydrocyclopenta[15]annulen-1-yl)propyl acetate | hemisynthesized from 78 for SAR studies |            | [59] |
| Compound (84) | macrocyclic compound | (3aR,5E,7R,10Z,14E,16aS)-7-hydroxy-3-((S)-1-hydroxypropan-2-yl)-2-methoxy-6,10,14,16a-tetramethyl-3a,4,8,9,12,13,16,16a-octahydrocyclopenta[15]annulen-1(7H)-one                       | hemisynthesized from 79 for SAR studies |            | [59] |
| Compound (85) | macrocyclic compound | (3aR,7R,16aS)-2,7-dihydroxy-3-((S)-1-hydroxypropan-2-yl)-6,10,14,16a-tetramethyl-4,5,6,7,8,9,10,11,12,13,14,15,16,16a-tetradecahydrocyclopenta[15]annulen-1(3aH)-one                   | hemisynthesized from 79 for SAR studies | antifungal | [59] |
| Compound (86) | macrocyclic compound | Bis-4-bromophenyl ((S)-2-((3aS,5E,9Z,13R,14E,16aR)-2,13-dihydroxy-3a,6,10,14-tetramethyl-3-oxo-3,3a,4,7,8,11,12,13,16,16a-decahydrocyclopenta[15]annulen-1-yl)propyl carbonate         | hemisynthesized from 79 for SAR studies |            | [59] |
| Compound (87) | macrocyclic compound | 4-bromophenyl ((3aR,5E,7R,10Z,14E,16aS)-2-hydroxy-3-((S)-1-hydroxypropan-2-yl)-6,10,14,16a-tetramethyl-1-oxo-1,3a,4,7,8,9,12,13,16,16a-decahydrocyclopenta[15]annulen-7-yl) carbonate  | hemisynthesized from 79 for SAR studies | antifungal | [59] |
| Compound (88) | pimarane diterpene   | (4a'R,4b'R,7'R,10a'S)-methyl 4b'-hydroxy-1',1',7'-trimethyl-10'-oxo-7'-vinyl-2',3',4',4a',4b',5',6',7',10',10a'-decahydro-1'H-spiro[oxirane-2,9'-phenanthrene]-4a'-carboxylate         | hemisynthesized from 1 for SAR studies  |            | [63] |
| Compound (89) | pimarane diterpene   | (4a'R,4b'R,7'R,10a'S)-methyl 4b'-methoxy-1',1',7'-trimethyl-10'-oxo-7'-vinyl-2',3',4',4a',4b',5',6',7',10',10a'-decahydro-1'H-spiro[oxirane-2,9'-phenanthrene]-4a'-carboxylate         | hemisynthesized from 1 for SAR studies  |            | [63] |
| Compound (90) | pimarane diterpene   | (2S,4aR,4bR,8aS,9S,10R)-2-ethyl-4a,9,10-trihydroxy-                                                                                                                                    | hemisynthesized from 1                  |            | [63] |



|                                                                              |                               |                                                                                                                                                                                                                  |                                        |               |         |
|------------------------------------------------------------------------------|-------------------------------|------------------------------------------------------------------------------------------------------------------------------------------------------------------------------------------------------------------|----------------------------------------|---------------|---------|
|                                                                              |                               | 2,8,8-trimethyl-3,4,4a,5,6,7,8,8a,9,10-decahydro-2H-9,4b-(epoxymethano)phenanthren-12-one                                                                                                                        | for SAR studies                        |               |         |
| Compound (91)                                                                | pimarane diterpene            | (2S,4aR,4bR,8aS,9S,10R)-2-ethyl-4a,9-dihydroxy-2,8,8-trimethyl-12-oxo-3,4,4a,5,6,7,8,8a,9,10-decahydro-2H-9,4b-(epoxymethano)phenanthren-10-yl acetate                                                           | hemisynthesized from 1 for SAR studies |               | [63]    |
| Compound (92)                                                                | pimarane diterpene            | (2S,4aR,4bR,8aS,9S,10R)-2-ethyl-4a,9-dihydroxy-2,8,8-trimethyl-12-oxo-3,4,4a,5,6,7,8,8a,9,10-decahydro-2H-9,4b-(epoxymethano)phenanthren-10-yl acetate                                                           | hemisynthesized from 2 for SAR studies |               | [63]    |
| Compound (93)                                                                | pimarane diterpene            | (4aR,4bR,7R,10aS)-methyl 4b-hydroxy-1,1,7,8-tetramethyl-9,10-dioxo-7-vinyl-1,2,3,4,4a,4b,5,6,7,9,10,10a-dodecahydrophenanthrene-4a-carboxylate                                                                   | hemisynthesized from 1 for SAR studies |               | [63]    |
| Compound (94)                                                                | pimarane diterpene            | (1R,1'R,2S,4'R)-methyl 1'-hydroxy-2-(2-hydroxyacetyl)-2',3,3,4'-tetramethyl-4'-vinyl-[1,1'-bi(cyclohexan)]-2'-ene-1-carboxylate                                                                                  | hemisynthesized from 2 for SAR studies |               | [63]    |
| Fischerindoline (95)                                                         | pyrroloindole sesquiterpenoid | (2S,3aR,8aR)-(1S,2R,4aR,5R,8R,8aR)-2-acetoxy-8a-hydroxy-3,8-dimethyl-5-(prop-1-en-2-yl)-1,2,4a,5,6,7,8,8a-octahydronaphthalen-1-yl 3a-hydroxy-8-methyl-1,2,3,3a,8,8a-hexahydropyrrolo[2,3-b]indole-2-carboxylate | <i>Neosartorya pseudofischeri</i>      |               | [66,67] |
| Eurochevalierine (96)                                                        | octahydronaphthalen           | (S)-(1S,2R,4aR,5R,8R,8aR)-2-acetoxy-8a-hydroxy-3,8-dimethyl-5-(prop-1-en-2-yl)-1,2,4a,5,6,7,8,8a-octahydronaphthalen-1-yl 2-formamido-4-(2-(methylamino)phenyl)-4-oxobutanoate                                   | <i>N. pseudofischeri</i>               |               | [66,67] |
| Neosartins A (97)                                                            | dihydropyrazino[1,2-a]indole  | 3-methoxy-2,3-dimethyl-2,3-dihydropyrazino[1,2-a]indole-1,4-dione                                                                                                                                                | <i>N. pseudofischeri</i>               |               | [65]    |
| Neosartins B (98)                                                            | dihydropyrazino[1,2-a]indole  | 3,3-dimethoxy-2-methyl-2,3-dihydropyrazino[1,2-a]indole-1,4-dione                                                                                                                                                | <i>N. pseudofischeri</i>               |               | [65]    |
| Neosartins C (99)                                                            | dihydropyrazino[1,2-a]indole  | 2,3-dimethyl-2,3-dihydropyrazino[1,2-a]indole-1,4-dione                                                                                                                                                          | <i>N. pseudofischeri</i>               |               | [65]    |
| 1,2,3,4-Tetrahydro-2,3-dimethyl-1,4-dioxypyrazino[1,2-a]indole (100)         | dihydropyrazino[1,2-a]indole  | 2-methyl-3-methylene-2,3-dihydropyrazino[1,2-a]indole-1,4-dione                                                                                                                                                  | <i>N. pseudofischeri</i>               | antibacterial | [65]    |
| 1,2,3,4-Tetrahydro-2-methyl-3-methylene-1,4-dioxypyrazino[1,2-a]indole (101) | dihydropyrazino[1,2-a]indole  | 2-methylpyrazino[1,2-a]indole-1,3,4(2H)-trione                                                                                                                                                                   | <i>N. pseudofischeri</i>               |               | [65]    |
| 1,2,3,4-Tetrahydro-2-methyl-1,3,4-trioxypyrazino [1,2-a]                     | dihydropyrazino[1,2-a]indole  | 1,2,3,4-tetrahydro-2-methyl-1,3,4-trioxypyrazino [1,2-a] indole                                                                                                                                                  | <i>N. pseudofischeri</i>               |               | [65]    |

|                                                         |                                                            |                                                                                                                                                                                                                                                                                                                                             |                                |               |      |
|---------------------------------------------------------|------------------------------------------------------------|---------------------------------------------------------------------------------------------------------------------------------------------------------------------------------------------------------------------------------------------------------------------------------------------------------------------------------------------|--------------------------------|---------------|------|
| indole (102)                                            |                                                            |                                                                                                                                                                                                                                                                                                                                             |                                |               |      |
| <i>N</i> -Methyl-1 <i>H</i> -indole-2-carboxamide (103) | indole                                                     | <i>N</i> -methyl-1 <i>H</i> -indole-2-carboxamide                                                                                                                                                                                                                                                                                           | <i>N. pseudofischeri</i>       |               | [65] |
| Gliotoxin (104)                                         | epidithiopyrazino[1,2- <i>a</i> ]indole                    | 6-hydroxy-3-(hydroxymethyl)-2-methyl-2,3,5a,6-tetrahydro-1 <i>H</i> -3,10a-epidithiopyrazino[1,2- <i>a</i> ]indole-1,4(10 <i>H</i> )-dione                                                                                                                                                                                                  | <i>N. pseudofischeri</i>       | antibacterial | [65] |
| Acetylgliotoxin (105)                                   | epidithiopyrazino[1,2- <i>a</i> ]indole                    | 3-(hydroxymethyl)-2-methyl-1,4-dioxo-2,3,4,5a,6,10-hexahydro-1 <i>H</i> -3,10a-epidithiopyrazino[1,2- <i>a</i> ]indol-6-yl acetate                                                                                                                                                                                                          | <i>N. pseudofischeri</i>       | antibacterial | [65] |
| Reduced gliotoxin (106)                                 | hexahydropyrazino[1,2- <i>a</i> ]indole                    | 6-hydroxy-3-(hydroxymethyl)-3,10a-dimercapto-2-methyl-2,3,5a,6,10,10a-hexahydropyrazino[1,2- <i>a</i> ]indole-1,4-dione                                                                                                                                                                                                                     | <i>N. pseudofischeri</i>       | antibacterial | [65] |
| 6-Acetylbis(methylthio)gliotoxin (107)                  | octahydropyrazino[1,2- <i>a</i> ]indol                     | 3-(hydroxymethyl)-2-methyl-3,10a-bis(methylthio)-1,4-dioxo-1,2,3,4,5a,6,10,10a-octahydropyrazino[1,2- <i>a</i> ]indol-6-yl acetate                                                                                                                                                                                                          | <i>N. pseudofischeri</i>       |               | [65] |
| Bisdethiobis(methylthio)gliotoxin (108)                 | octahydropyrazino[1,2- <i>a</i> ]indol                     | 3-(hydroxymethyl)-2-methyl-3,10a-bis(methylthio)-1,4-dioxo-1,2,3,4,5a,6,10,10a-octahydropyrazino[1,2- <i>a</i> ]indol-6-yl acetate                                                                                                                                                                                                          | <i>N. pseudofischeri</i>       |               | [65] |
| Didehydrobisdethiobis(methylthio)gliotoxin (109)        | tetrahydropyrazino[1,2- <i>a</i> ]indole                   | 3-(hydroxymethyl)-2-methyl-3,10a-bis(methylthio)-2,3,10,10a-tetrahydropyrazino[1,2- <i>a</i> ]indole-1,4-dione                                                                                                                                                                                                                              | <i>N. pseudofischeri</i>       |               | [65] |
| Bis- <i>N</i> -norgliovictin (110)                      | bis(methylthio)piperazine                                  | 3-benzyl-6-(hydroxymethyl)-1-methyl-3,6-bis(methylthio)piperazine-2,5-dione                                                                                                                                                                                                                                                                 | <i>N. pseudofischeri</i>       |               | [65] |
| Pyripyropene A (111)                                    | dodecahydrobenzo[ <i>f</i> ]pyrano[4,3- <i>b</i> ]chromene | (3 <i>S</i> ,4 <i>R</i> ,4 <i>aR</i> ,6 <i>S</i> ,6 <i>aS</i> ,12 <i>R</i> ,12 <i>aS</i> ,12 <i>bS</i> )-4-(acetoxymethyl)-12-hydroxy-4,6a,12b-trimethyl-11-oxo-9-(pyridin-3-yl)-1,2,3,4,4a,5,6,6a,11,12,12a,12b-dodecahydrobenzo[ <i>f</i> ]pyrano[4,3- <i>b</i> ]chromene-3,6-diyl diacetate                                              | <i>N. pseudofischeri</i>       |               | [65] |
| Boydines A (112)                                        | epipolythiodioxopiperazine                                 | (4 <i>S</i> ,4 <i>aS</i> ,6 <i>aR</i> ,11 <i>S</i> ,11 <i>aS</i> ,13 <i>aR</i> )-4,11-dihydroxy-6a,13a-bis(methylthio)-4,4a,6a,7,11,11a,13a,14-octahydropyrazino[1,2- <i>a</i> :4,5- <i>a'</i> ]diindole-6,13-dione                                                                                                                         | <i>Pseudallescheria boydii</i> |               | [68] |
| Boydines B (113)                                        | epipolythiodioxopiperazine                                 | (2 <i>S</i> ,3 <i>R</i> ,4 <i>S</i> , <i>E</i> )-(4 <i>S</i> ,4 <i>aS</i> ,6 <i>aR</i> ,11 <i>S</i> ,11 <i>aS</i> ,13 <i>aR</i> )-11-hydroxy-6a,13a-bis(methylthio)-6,13-dioxo-4,4a,6,6a,7,11,11a,13,13a,14-decahydropyrazino[1,2- <i>a</i> :4,5- <i>a'</i> ]diindol-4-yl 3-hydroxy-2,4,6-trimethyl-5-oxooct-6-enoate                       | <i>P. boydii</i>               | antibacterial | [68] |
| Boydines C (114)                                        | epipolythiodioxopiperazine                                 | (2 <i>S</i> ,3 <i>R</i> ,4 <i>S</i> , <i>E</i> )-(5 <i>S</i> ,5 <i>aS</i> ,7 <i>aR</i> ,12 <i>S</i> ,12 <i>aS</i> ,14 <i>aR</i> )-12-hydroxy-7a,14a-bis(methylthio)-7,14-dioxo-5,5a,7,7a,8,12,12a,14,14a,15-decahydrooxepino[3''':4''':5'']pyrrolo[1',2':4,5]pyrazino[1,2- <i>a</i> ]indol-5-yl 3-hydroxy-2,4,6-trimethyl-5-oxooct-6-enoate | <i>P. boydii</i>               |               | [68] |
| Boydines D (115)                                        | epipolythiodioxopiperazine                                 | (2 <i>S</i> ,3 <i>R</i> ,4 <i>S</i> , <i>E</i> )-(5 <i>S</i> ,5 <i>aS</i> ,7 <i>aR</i> ,14 <i>aR</i> )-12-hydroxy-7a,14a-                                                                                                                                                                                                                   | <i>P. boydii</i>               |               | [68] |

|                                                                       |                     |                                                                                                                                                                         |                                                 |               |      |
|-----------------------------------------------------------------------|---------------------|-------------------------------------------------------------------------------------------------------------------------------------------------------------------------|-------------------------------------------------|---------------|------|
|                                                                       |                     | bis(methylthio)-7,14-dioxo-5,5a,7,7a,8,14,14a,15-octahydrooxepino[3',4''-4',5']pyrrolo[1',2':4,5]pyrazin o[1,2-a]indol-5-yl 3-hydroxy-2,4,6-trimethyl-5-oxooct-6-enoate |                                                 |               |      |
| 4a- <i>epi</i> -9 $\alpha$ -Methoxydihydrodeoxybostrycin (116)        | hydroanthraquinone  | (2R,3S,4aS,9aR,10R)-2,3,5,8-tetrahydroxy-6,10-dimethoxy-3-methyl-1,3,4,4a,9a,10-hexahydroanthracen-9(2H)-one                                                            | <i>Nigrospora</i> sp.                           |               | [69] |
| 10-Deoxybostrycin (117)                                               | anthracene compound | (1S,2R,3S)-6-methoxy-3-methyl-1,2,3,4-tetrahydroanthracene-1,2,3,5,8,10-hexaol                                                                                          | <i>Nigrospora</i> sp.                           |               | [69] |
| Nigrosporin B (118)                                                   | anthracene compound | (6S,7R)-3-methoxy-6-methyl-5,6,7,8-tetrahydroanthracene-1,4,6,7,9-pentaol                                                                                               | <i>Nigrospora</i> sp.                           | antibacterial | [69] |
| 9 $\alpha$ -Hydroxydihydrodesoxybostrycin (119)                       | hydroanthraquinone  | (2R,3S,4aS,9aS,10R)-2,3,5,8,10-pentahydroxy-6-methoxy-3-methyl-1,3,4,4a,9a,10-hexahydroanthracen-9(2H)-one                                                              | <i>Nigrospora</i> sp.                           |               | [69] |
| 9 $\alpha$ -Hydroxyhalorosellinia A (120)                             | hydroanthraquinone  | (2R,3S,4aR,9aR,10R)-2,3,5,8,9a,10-hexahydroxy-6-methoxy-3-methyl-1,3,4,4a,9a,10-hexahydroanthracen-9(2H)-one                                                            | <i>Nigrospora</i> sp.                           |               | [69] |
| 4-Deoxybostrycin (121)                                                | hydroanthraquinone  | (6R,7S)-2-methoxy-7-methyl-5,6,7,8-tetrahydroanthracene-1,4,6,7,9,10-hexaol                                                                                             | <i>Nigrospora</i> sp.                           |               | [69] |
| Bostrycin (122)                                                       | anthracene compound | (1S,2R,3S)-6-methoxy-3-methyl-1,2,3,4-tetrahydroanthracene-1,2,3,5,8,9,10-heptaol                                                                                       | <i>Nigrospora</i> sp.                           |               | [69] |
| Austrocortirubin (123)                                                | anthraquinone       | 1,4,6-trihydroxy-2-methoxy-7-methylanthracene-9,10-dione                                                                                                                | <i>Nigrospora</i> sp.                           |               | [69] |
| 3,5,8-Trihydroxy-7-methoxy-2-methylanthracene-9,10-dione (124)        | anthraquinone       | 1-hydroxy-3-methoxy-6-methylanthracene-9,10-dione                                                                                                                       | <i>Nigrospora</i> sp.                           |               | [69] |
| 3-Acetoxy-4-deoxybostrycin (125)                                      | anthracene compound | (2R,3S)-3,5,8,9,10-pentahydroxy-6-methoxy-3-methyl-1,2,3,4-tetrahydroanthracen-2-yl acetate                                                                             | hemisynthesized from <b>121</b> for SAR studies | antibacterial | [69] |
| 3-Acetoxybostrycin (126)                                              | anthracene compound | (1S,2R,3S)-1,3,5,8,9,10-hexahydroxy-6-methoxy-3-methyl-1,2,3,4-tetrahydroanthracen-2-yl acetate                                                                         | hemisynthesized from <b>122</b> for SAR studies |               | [69] |
| 8-Acetoxy-3,5-dihydroxy-7-methoxy-2-methylanthracene-9,10-dione (127) | anthraquinone       | 4,6-dihydroxy-2-methoxy-7-methyl-9,10-dioxo-9,10-dihydroanthracen-1-yl acetate                                                                                          | hemisynthesized from <b>124</b> for SAR studies |               | [69] |
| 5-Acetoxy-3,8-dihydroxy-7-methoxy-2-methylanthracene-9,10-dione (128) | anthraquinone       | 4,7-dihydroxy-3-methoxy-6-methyl-9,10-dioxo-9,10-dihydroanthracen-1-yl acetate                                                                                          | hemisynthesized from <b>124</b> for SAR studies |               | [69] |
| 3-Acetoxy-5,8-dihydroxy-7-methoxy-2-methylanthracene-9,10-dione (129) | anthraquinone       | 5,8-dihydroxy-6-methoxy-3-methyl-9,10-dioxo-9,10-dihydroanthracen-2-yl acetate                                                                                          | hemisynthesized from <b>124</b> for SAR studies |               | [69] |
| 5,8-Diacetoxy-3-hydroxy-7-methoxy-2-methylanthracene-9,10-dione (130) | anthraquinone       | 6-hydroxy-2-methoxy-7-methyl-9,10-dioxo-9,10-dihydroanthracene-1,4-diyl diacetate                                                                                       | hemisynthesized from <b>124</b> for SAR studies |               | [69] |

|                                                                       |                      |                                                                                           |                                          |                      |         |
|-----------------------------------------------------------------------|----------------------|-------------------------------------------------------------------------------------------|------------------------------------------|----------------------|---------|
| 3,8-Diacetoxy-5-hydroxy-7-methoxy-2-methylanthracene-9,10-dione (131) | anthraquinone        | 4-hydroxy-2-methoxy-7-methyl-9,10-dioxo-9,10-dihydroanthracene-1,6-diyl diacetate         | hemisynthesized from 124 for SAR studies |                      | [69]    |
| 3,5-Diacetoxy-8-hydroxy-7-methoxy-2-methylanthracene-9,10-dione (132) | anthraquinone        | 4-hydroxy-3-methoxy-6-methyl-9,10-dioxo-9,10-dihydroanthracene-1,7-diyl diacetate         | hemisynthesized from 124 for SAR studies |                      | [69]    |
| 3,5,8-Triacetoxy-7-methoxy-2-methylanthracene-9,10-dione (133)        | anthraquinone        | 2-methoxy-7-methyl-9,10-dioxo-9,10-dihydroanthracene-1,4,6-triyl triacetate               | hemisynthesized from 124 for SAR studies |                      | [69]    |
| 8-Acetoxyaustrocortirubin (134)                                       | hydroanthraquinone   | 4-hydroxy-2-methoxy-7-methyl-9,10-dioxo-9,10-dihydroanthracen-1-yl acetate                | hemisynthesized from 123 for SAR studies |                      | [69]    |
| Spiromastixones A (135)                                               | depsidone analogue   | 3,8-dihydroxy-1,6-dipropyl-11H-dibenzo[b,e][1,4]dioxepin-11-one                           | <i>Spiromastix</i> sp.                   |                      | [70]    |
| Spiromastixones B (136)                                               | depsidone analogue   | 2-chloro-3,8-dihydroxy-1,6-dipropyl-11H-dibenzo[b,e][1,4]dioxepin-11-one                  | <i>Spiromastix</i> sp.                   |                      | [70]    |
| Spiromastixones C (137)                                               | depsidone analogue   | 4-chloro-3,8-dihydroxy-1,6-dipropyl-11H-dibenzo[b,e][1,4]dioxepin-11-one                  | <i>Spiromastix</i> sp.                   |                      | [70]    |
| Spiromastixones D (138)                                               | depsidone analogue   | 4,7-dichloro-3,8-dihydroxy-1,6-dipropyl-11H-dibenzo[b,e][1,4]dioxepin-11-one              | <i>Spiromastix</i> sp.                   |                      | [70]    |
| Spiromastixones E (139)                                               | depsidone analogue   | 2,4-dichloro-3,8-dihydroxy-1,6-dipropyl-11H-dibenzo[b,e][1,4]dioxepin-11-one              | <i>Spiromastix</i> sp.                   |                      | [70]    |
| Spiromastixones F (140)                                               | depsidone analogue   | 2,4,7-trichloro-3,8-dihydroxy-1,6-dipropyl-11H-dibenzo[b,e][1,4]dioxepin-11-one           | <i>Spiromastix</i> sp.                   | antibacterial        | [70]    |
| Spiromastixones G (141)                                               | depsidone analogue   | 2,4,7-trichloro-3-hydroxy-8-methoxy-1,6-dipropyl-11H-dibenzo[b,e][1,4]dioxepin-11-one     | <i>Spiromastix</i> sp.                   | antibacterial        | [70]    |
| Spiromastixones H (142)                                               | depsidone analogue   | 2,4,9-trichloro-3,8-dihydroxy-1,6-dipropyl-11H-dibenzo[b,e][1,4]dioxepin-11-one           | <i>Spiromastix</i> sp.                   | antibacterial        | [70]    |
| Spiromastixones I (143)                                               | depsidone analogue   | 2,4,7,9-tetrachloro-3,8-dihydroxy-1,6-dipropyl-11H-dibenzo[b,e][1,4]dioxepin-11-one       | <i>Spiromastix</i> sp.                   | antibacterial        | [70]    |
| Spiromastixones J (144)                                               | depsidone analogue   | 2,4,7,9-tetrachloro-3-hydroxy-8-methoxy-1,6-dipropyl-11H-dibenzo[b,e][1,4]dioxepin-11-one | <i>Spiromastix</i> sp.                   | antibacterial        | [70]    |
| Spiromastixones K (145)                                               | depsidone analogue   | 2,4,7-trichloro-3-hydroxy-8-methoxy-1,9-dipropyl-11H-dibenzo[b,e][1,4]dioxepin-11-one     | <i>Spiromastix</i> sp.                   |                      | [70]    |
| Spiromastixones L (146)                                               | depsidone analogue   | 2,4,6,7-tetrachloro-3-hydroxy-8-methoxy-1,9-dipropyl-11H-dibenzo[b,e][1,4]dioxepin-11-one | <i>Spiromastix</i> sp.                   |                      | [70]    |
| Spiromastixones M (147)                                               | depsidone analogue   | 2,4-dichloro-3,8-dihydroxy-1,9-dipropyl-11H-dibenzo[b,e][1,4]dioxepin-11-one              | <i>Spiromastix</i> sp.                   |                      | [70]    |
| Spiromastixones N (148)                                               | depsidone analogue   | 2,4,7-trichloro-3,8-dihydroxy-1,9-dipropyl-11H-dibenzo[b,e][1,4]dioxepin-11-one           | <i>Spiromastix</i> sp.                   |                      | [70]    |
| Spiromastixones O (149)                                               | depsidone analogue   | 2,4,6,7-tetrachloro-3,8-dihydroxy-1,9-dipropyl-11H-dibenzo[b,e][1,4]dioxepin-11-one       | <i>Spiromastix</i> sp.                   |                      | [70]    |
| Cyclopaldic acid (150)                                                | dihydroisobenzofuran | 3,5-dihydroxy-7-methoxy-6-methyl-1-oxo-1,3-                                               | <i>Seiridium cupressi</i>                | insecticide activity | [78,80] |

|                                    |                      |                                                                                                                                                                                                                                                               |                                                 |               |             |
|------------------------------------|----------------------|---------------------------------------------------------------------------------------------------------------------------------------------------------------------------------------------------------------------------------------------------------------|-------------------------------------------------|---------------|-------------|
|                                    |                      | dihydroisobenzofuran-4-carbaldehyde                                                                                                                                                                                                                           |                                                 |               |             |
| Compound (151)                     | dihydroisobenzofuran | 7-methoxy-6-methyl-1-oxo-1,3-dihydroisobenzofuran-4-carboxylic acid                                                                                                                                                                                           | hemisynthesized from <b>150</b> for SAR studies |               | [78,80]     |
| Compound (152)                     | dihydroisobenzofuran | 7-formyl-6-hydroxy-4-methoxy-5-methyl-3-oxo-1,3-dihydroisobenzofuran-1-yl acetate                                                                                                                                                                             | hemisynthesized from <b>150</b> for SAR studies |               | [78,80]     |
| Compound (153)                     | dihydroisobenzofuran | (3,5-diacetoxy-7-methoxy-6-methyl-1-oxo-1,3-dihydroisobenzofuran-4-yl)methylene diacetate                                                                                                                                                                     | hemisynthesized from <b>150</b> for SAR studies |               | [78,80]     |
| Compound (154)                     | dihydroisobenzofuran | 4-isobenzofurancarboxaldehyde, 1,3-dihydro-3,5-dihydroxy-7-methoxy-6-methyl-1-oxo-, 4-[2-(2,4-dinitrophenyl)hydrazone]                                                                                                                                        | hemisynthesized from <b>150</b> for SAR studies |               | [78,80]     |
| Compound (155)                     | dihydroisobenzofuran | 1-naphthalenesulfonic acid, 5-(dimethylamino)-, 2-[(1,3-dihydro-3,5-dihydroxy-7-methoxy-6-methyl-1-oxo-4-isobenzofuranyl)methylene]hydrazide                                                                                                                  | hemisynthesized from <b>150</b> for SAR studies |               | [78,80]     |
| Compound (156)                     | aromatic compound    | benzoic acid, 2,3-bis[[2-[[5-(dimethylamino)-1-naphthalenyl]sulfonyl]hydrazinylidene]methyl]-4-hydroxy-6-methoxy-5-methyl-                                                                                                                                    | hemisynthesized from <b>150</b> for SAR studies |               | [78,80]     |
| Compound (157)                     | dihydroisobenzofuran | 7-formyl-6-hydroxy-4-methoxy-5-methyl-3-oxo-1,3-dihydroisobenzofuran-1-yl 5-azidopentanoate                                                                                                                                                                   | hemisynthesized from <b>150</b> for SAR studies |               | [78,80]     |
| Compound (158)                     | dihydroisobenzofuran | 5-hydroxy-7-methoxy-6-methyl-2a,4-dihydro-1 <i>H</i> -2,3-dioxacyclopenta[ <i>cd</i> ]inden-1-one                                                                                                                                                             | hemisynthesized from <b>150</b> for SAR studies |               | [78,80]     |
| Compound (159)                     | isobenzofuran        | 5-hydroxy-4-(hydroxymethyl)-7-methoxy-6-methylisobenzofuran-1(3 <i>H</i> )-one                                                                                                                                                                                | hemisynthesized from <b>150</b> for SAR studies |               | [78,80]     |
| Seiridin (160)                     | furanone             | ( <i>R</i> )-4-(6-hydroxyheptyl)furan-2(5 <i>H</i> )-one                                                                                                                                                                                                      | <i>Seiridium cardinale</i>                      |               | [82]        |
| 2'- <i>O</i> -Acetylseiridin (161) | furanone             | ( <i>R</i> )-7-(4-methyl-5-oxo-2,5-dihydrofuran-3-yl)heptan-2-yl acetate                                                                                                                                                                                      | hemisynthesized from <b>160</b> for SAR studies |               | [82]        |
| Compound (162)                     | furanone             | 4-(( <i>R</i> )-6-hydroxyheptyl)-3-methyl-dihydrofuran-2(3 <i>H</i> )-one                                                                                                                                                                                     | hemisynthesized from <b>160</b> for SAR studies |               | [82]        |
| Compound (163)                     | furanone             | 3-methyl-4-(6-oxoheptyl)furan-2(5 <i>H</i> )-one                                                                                                                                                                                                              | hemisynthesized from <b>160</b> for SAR studies |               | [82]        |
| Isoseiridin (164)                  | furanone             | ( <i>R</i> )-4-(5-hydroxyheptyl)furan-2(5 <i>H</i> )-one                                                                                                                                                                                                      | <i>S. cardinale</i>                             |               | [82]        |
| Compound (165)                     | pimarane diterpene   | 4-azidobutyl ((2 <i>R</i> ,4 <i>aR</i> ,4 <i>bR</i> ,8 <i>aS</i> ,9 <i>R</i> )-4 <i>a</i> -hydroxy-2,8,8-trimethyl-10,12-dioxo-2-vinyl-3,4,4 <i>a</i> ,5,6,7,8,8 <i>a</i> ,9,10-decahydro-2 <i>H</i> -9,4 <i>b</i> -(epoxymethano)phenanthren-9-yl) carbonate | hemisynthesized from <b>1</b> for SAR studies   |               | [78]        |
| Compound (166)                     | pimarane diterpene   | (2 <i>R</i> ,4 <i>aR</i> ,4 <i>bR</i> ,8 <i>aS</i> ,9 <i>S</i> ,10 <i>R</i> )-4 <i>a</i> -hydroxy-9,10-dimethoxy-2,8,8-trimethyl-2-vinyl-3,4,4 <i>a</i> ,5,6,7,8,8 <i>a</i> ,9,10-decahydro-2 <i>H</i> -9,4 <i>b</i> -(epoxymethano)phenanthren-12-one        | hemisynthesized from <b>2</b> for SAR studies   |               | [78]        |
| Papyracillic acid (167)            | dioxaspiro           | (5 <i>S</i> ,7 <i>R</i> ,8 <i>S</i> )-7-hydroxy-4-methoxy-7,8-dimethyl-9-methylene-1,6-dioxaspiro[4.4]non-3-en-2-one                                                                                                                                          | <i>Ascochyta agropyrina</i> var. <i>nana</i>    | mycoherbicide | [79,83, 84] |
| Compound (168)                     | furanone             | 3-methoxy-2-(3-methyl-4-oxopent-1-en-2-yl)-5-oxo-2,5-dihydrofuran-2-yl acetate                                                                                                                                                                                | hemisynthesized from <b>167</b> for SAR studies |               | [84,85]     |

|                            |                    |                                                                                                                                                                                                                 |                                                 |                       |         |
|----------------------------|--------------------|-----------------------------------------------------------------------------------------------------------------------------------------------------------------------------------------------------------------|-------------------------------------------------|-----------------------|---------|
| Compound (169)             | furanone           | (Z)-2-(3-methoxy-5-oxofuran-2(5H)-ylidene)-3-methyl-4-oxopentyl acetate                                                                                                                                         | hemisynthesized from <b>167</b> for SAR studies |                       | [84,85] |
| Compound (170)             | furanone           | (E)-2-(3-methoxy-5-oxofuran-2(5H)-ylidene)-3-methyl-4-oxopentyl acetate                                                                                                                                         | hemisynthesized from <b>167</b> for SAR studies |                       | [84,85] |
| Compound (171)             | dioxaspiro         | (5S,7R,8S,9R)-7-hydroxy-4,7,8,9-tetramethyl-1,6-dioxaspiro[4.4]non-3-en-2-one                                                                                                                                   | hemisynthesized from <b>167</b> for SAR studies |                       | [84,85] |
| Compound (172)             | dioxaspiro         | (5S,7R,8S)-4,7-dimethoxy-7,8-dimethyl-9-methylene-1,6-dioxaspiro[4.4]non-3-en-2-one                                                                                                                             | hemisynthesized from <b>167</b> for SAR studies |                       | [84,85] |
| Compound (173)             | dioxaspiro         | (5S,7R,8S)-7-ethoxy-4-methoxy-7,8-dimethyl-9-methylene-1,6-dioxaspiro[4.4]non-3-en-2-one                                                                                                                        | hemisynthesized from <b>167</b> for SAR studies |                       | [84,85] |
| Compound (174)             | dimethylcyclobutyl | (2S)-2-(3-(heptyloxy)-2,3-dimethylcyclobut-1-en-1-yl)-3-methoxy-2,5-dihydrofuran-2,5-diol                                                                                                                       | hemisynthesized from <b>167</b> for SAR studies |                       | [84,85] |
| Compound (175)             | dimethylcyclobutyl | (2R)-2-(3-(heptyloxy)-2,3-dimethylcyclobut-1-en-1-yl)-3-methoxy-2,5-dihydrofuran-2,5-diol                                                                                                                       | hemisynthesized from <b>167</b> for SAR studies |                       | [84,85] |
| Compound (176)             | oxadiazine         | (E)-methyl 3-methoxy-3-(5-((1S)-1-(2-methyloxiran-2-yl)ethyl)-4H-1,2,3-oxadiazin-6-yl)acrylate                                                                                                                  | hemisynthesized from <b>167</b> for SAR studies |                       | [84,85] |
| Compound (177)             | oxadiazetyl        | (E)-methyl 3-methoxy-3-(3-((1S)-1-(4-methyl-4H-1,2,3-oxadiazet-4-yl)ethyl)-4,5-dihydrofuran-2-yl)acrylate                                                                                                       | hemisynthesized from <b>167</b> for SAR studies |                       | [84,85] |
| Compound (178)             | oxadiazetyl        | (E)-methyl 3-methoxy-3-(3-((1R)-1-(4-methyl-4H-1,2,3-oxadiazet-4-yl)ethyl)-4,5-dihydrofuran-2-yl)acrylate                                                                                                       | hemisynthesized from <b>167</b> for SAR studies |                       | [84,85] |
| Preaustinoid A (179)       | meroterpenoids     | (6aR,7S,9R,11S,12bR)-methyl 9-hydroxy-4,4,6a,9,11,12b-hexamethyl-13-methylene-3,8,10-trioxohexadecahydro-7,11-methanocycloocta[a]naphthalene-7-carboxylate                                                      | <i>Penicillium sp.</i>                          |                       | [86-89] |
| Preaustinoid B (180)       | meroterpenoids     | (6aR,7S,9R,10S,11bR)-methyl 9-acetyl-9-hydroxy-4,4,6a,10,11b-pentamethyl-12-methylene-3,8-dioxotetradecahydro-1H-7,10-methanocyclohepta[a]naphthalene-7-carboxylate                                             | <i>Penicillium sp.</i>                          |                       | [86-89] |
| Preaustinoid A2 (181)      | meroterpenoids     | (7aR,8S,10R,12S,13bR)-methyl 10-hydroxy-5,5,7a,10,12,13b-hexamethyl-14-methylene-3,9,11-trioxo-3,5,5a,6,7,7a,8,9,10,11,12,13,13a,13b-tetradecahydro-8,12-methanocycloocta[3,4]benzo[1,2-c]oxepine-8-carboxylate | <i>Penicillium sp.</i>                          |                       | [86-89] |
| Dehydroaustin (182)        | meroterpenoids     | (1S,3aR,3'S,5R,6R,10aR,11aS)-1,2',2',5-tetramethyl-4,7-dimethylene-3,6',12-trioxo-2',3,4,5,6,6a,6',7,9,10-decahydro-1H-spiro[5,11a-(epoxymethano)naphtho[1',8a':3,4]oxeto[2,3-c]furan-8,3'-pyran]-6-yl acetate  | <i>Penicillium sp.</i>                          | larvicidal activities | [86-89] |
| Acetoxydehydroaustin (183) | meroterpenoids     | (1S,3aR,3'S,5R,6R,10S,10aR,11aS)-1,2',2',5-                                                                                                                                                                     | <i>Penicillium sp.</i>                          | larvicidal activities | [86-89] |

|                   |                             |                                                                                                                                                                                                                                          |                                                      |              |         |
|-------------------|-----------------------------|------------------------------------------------------------------------------------------------------------------------------------------------------------------------------------------------------------------------------------------|------------------------------------------------------|--------------|---------|
|                   |                             | tetramethyl-4,7-dimethylene-3,6',12-trioxo-2',3,4,5,6,6a,6',7,9,10-decahydro-1H-spiro[5,11a-(epoxymethano)naphtho[1',8a':3,4]oxeto[2,3-c]furan-8,3'-pyran]-6,10-diyl diacetate                                                           |                                                      |              |         |
| Neoaustin (184)   | meroterpenoids              | (3S,3aS,3'S,5S,6aR,10aR,10bS)-3a-hydroxy-2',2',3,5,10a-pentamethyl-7,11-dimethylene-3,3a,5,6,6a,7,10,10a-octahydro-1H-spiro[5,10b-methanobenzo[3,4]cyclohepta[1,2-c]furan-8,3'-pyran]-1,4,6'(2'H,9H)-trione                              | <i>Penicillium sp.</i>                               |              | [86-89] |
| Austin (185)      | meroterpenoids              | (3S,3aS,3'S,6R,7R,11aR,11bS)-3a-hydroxy-2',2',3,6,8,11a-hexamethyl-12-methylene-1,4,6'-trioxo-2',3,3a,4,6,6',7,10,11,11a-decahydro-1H-spiro[6,11b-methanobenzo[e]furo[3,4-c]oxocine-9,3'-pyran]-7-yl acetate                             | <i>Penicillium sp.</i>                               |              | [86-89] |
| Okaramine A (186) | prenylated indole alkaloids | 5H-indolo[3''',2''':4'',5'']azocino[1'',2''':4'',5'']pyrazino[1',2':1,5]pyrrolo[2,3-b]indole-10,18(6H,10aH)-dione, 16-(1,1-dimethyl-2-propen-1-yl)-11,11a,16,16a-tetrahydro-11a-hydroxy-6,6-dimethyl-, (10aR,11aR,16aS)-                 | <i>Penicillium simplicissimum</i> AK-40 (ATCC 90288) |              | [87-90] |
| Okaramine B (187) | prenylated indole alkaloids | 5H-azeto[1,2-a]indolo[3''',2''':4'',5'']azocino[1'',2''':4'',5'']pyrazino[1',2':1,5]pyrrolo[2,3-b]indole-10,20(6H,10aH)-dione, 11,11a,17,18-tetrahydro-10a,11a-dihydroxy-11-methoxy-6,6,17,17,18-pentamethyl-, (10aS,11S,11aR,18R,18aS)- | <i>P. simplicissimum</i> AK-40 (ATCC 90288)          | insecticidal | [87-90] |
| Okaramine C (188) | prenylated indole alkaloids | 2H-pyrazino[1',2':1,5]pyrrolo[2,3-b]indole-1,4(3H,5aH)-dione, 6-(1,1-dimethyl-2-propen-1-yl)-3-[[2-(1,1-dimethyl-2-propen-1-yl)-1H-indol-3-yl]methyl]-6,10b,11,11a-tetrahydro-10b-hydroxy-, (3S,5aR,10bS,11aS)-                          | <i>P. simplicissimum</i> AK-40 (ATCC 90288)          |              | [87-90] |
| Okaramine G (189) | prenylated indole alkaloids | 2H-Pyrazino[1',2':1,5]pyrrolo[2,3-b]indole-1,4(3H,5aH)-dione, 6-(1,1-dimethyl-2-propen-1-yl)-3-[[2-(1,1-dimethyl-2-propen-1-yl)-1H-indol-3-yl]methylene]-6,10b,11,11a-tetrahydro-10b-hydroxy-, (3Z,5aS,10bR,11aR)-                       | <i>P. simplicissimum</i> AK-40 (ATCC 90288)          |              | [87-90] |
| Okaramine H (190) | prenylated indole alkaloids | 5H-indolo[3''',2''':4'',5'']azocino[1'',2''':4'',5'']pyrazino[1',2':1,5]pyrrolo[2,3-b]indole-10,18(6H,10aH)-dione, 11,11a,16,16a-tetrahydro-11a-hydroxy-6,6-dimethyl-16-(3-methyl-2-buten-1-yl)-, (10aR,11aR,16aS)-                      | <i>P. simplicissimum</i> AK-40 (ATCC 90288)          |              | [87-90] |
| Okaramine I (191) | prenylated indole alkaloids | 5H-indolo[3''',2''':4'',5'']azocino[1'',2''':4'',5'']pyrazino[1',2':1,5]pyrrolo[2,3-b]indole-10,18(6H,10aH)-dione, 11,11a,16,16a-tetrahydro-11a-hydroxy-6,6-dimethyl-, (10aR,11aR,16aS)-                                                 | <i>P. simplicissimum</i> AK-40 (ATCC 90288)          |              | [87-90] |

|                                                                                                                   |                             |                                                                                                                                                                                                                                                                                                                   |                                                             |               |         |
|-------------------------------------------------------------------------------------------------------------------|-----------------------------|-------------------------------------------------------------------------------------------------------------------------------------------------------------------------------------------------------------------------------------------------------------------------------------------------------------------|-------------------------------------------------------------|---------------|---------|
| Okaramine N (192)                                                                                                 | prenylated indole alkaloids | 5 <i>H</i> -indolo[3''',2''':4'',5'']azocino[1'',2'':4',5']pyrazino[1',2':1,5]pyrrolo[2,3- <i>b</i> ]indole-10,18(6 <i>H</i> ,10 <i>aH</i> )-dione, 16-(1,1-dimethyl-2-propen-1-yl)-11,11a,16,16a,18a,19-hexahydro-11a-hydroxy-6,6-dimethyl-, (10a <i>S</i> ,11a <i>S</i> ,16a <i>R</i> ,18a <i>S</i> )-          | <i>P. simplicissimum</i> AK-40 (ATCC 90288)                 |               | [87-90] |
| Okaramine Q (193)                                                                                                 | prenylated indole alkaloids | 5 <i>H</i> -azeto[1,2- <i>a</i> ]indolo[3''',2''':4'',5'']azocino[1'',2'':4',5']pyrazino[1',2':1,5]pyrrolo[2,3- <i>b</i> ]indole-10,20(6 <i>H</i> ,10 <i>aH</i> )-dione, 11,11a,17,18-tetrahydro-10a,11a-dihydroxy-6,6,17,17,18-pentamethyl-, (10a <i>R</i> ,11a <i>S</i> ,18 <i>S</i> ,18a <i>R</i> )-           | <i>P. simplicissimum</i> AK-40 (ATCC 90288)                 |               | [87-90] |
| 2-Dehydroxy-3-demethoxy okaramine B (194)                                                                         | prenylated indole alkaloids | 5 <i>H</i> -azeto[1,2- <i>a</i> ]indolo[3''',2''':4'',5'']azocino[1'',2'':4',5']pyrazino[1',2':1,5]pyrrolo[2,3- <i>b</i> ]indole-10,20(6 <i>H</i> ,10 <i>aH</i> )-dione, 11,11a,17,18-tetrahydro-11a-hydroxy-6,6,17,17,18-pentamethyl-, (10a <i>R</i> ,11a <i>S</i> ,18 <i>S</i> ,18a <i>R</i> )-                 | <i>P. simplicissimum</i> AK-40 (ATCC 90288)                 |               | [87-90] |
| Cyclo(N8-( $\alpha,\alpha$ -dimethylallyl)-L-Trp-6a' <sup>-</sup> -( $\alpha,\alpha$ -dimethylallyl)-L-Trp) (195) | prenylated indole alkaloids | (3 <i>S</i> ,6 <i>S</i> )-3-((1-(2-methylbut-3-en-2-yl)-1 <i>H</i> -indol-3-yl)methyl)-6-((2-(2-methylbut-3-en-2-yl)-1 <i>H</i> -indol-3-yl)methyl)piperazine-2,5-dione                                                                                                                                           | <i>P. simplicissimum</i> AK-40 (ATCC 90288)                 |               | [87-90] |
| Chenopodolin (196)                                                                                                | pimarane diterpene          | (1 <i>S</i> ,2 <i>S</i> ,5 <i>S</i> ,5a <i>S</i> ,9 <i>S</i> ,10 <i>S</i> ,11a <i>S</i> ,11b <i>S</i> ,12 <i>S</i> )-12-hydroxy-5,9,11b-trimethyl-4,6-dioxo-9-vinyl-1,2,4,5,5a,6,8,9,10,11,11a,11b-dodecahydro-2,5-methanonaphtho[1,2- <i>d</i> ]oxepine-1,10-diyl diacetate                                      | <i>Phoma chenopodiicola</i>                                 | phytotoxicity | [91,92] |
| Stagonolide (197)                                                                                                 | nonenolides                 | (9 <i>R</i> ,10 <i>R</i> , <i>E</i> )-9-hydroxy-10-propyl-4,5,9,10-tetrahydro-2 <i>H</i> -oxecine-2,8(3 <i>H</i> )-dione                                                                                                                                                                                          | <i>P. chenopodiicola</i>                                    |               | [93]    |
| Putaminoxin (198)                                                                                                 | nonenolides                 | (6 <i>S</i> , <i>Z</i> )-6-hydroxy-10-propyl-3,4,5,6,9,10-hexahydro-2 <i>H</i> -oxecin-2-one                                                                                                                                                                                                                      | <i>P. chenopodiicola</i>                                    | phytotoxicity | [93]    |
| Pinolidoxin (199)                                                                                                 | nonenolides                 | (2 <i>E</i> ,4 <i>E</i> )-(3 <i>S</i> ,8 <i>R</i> ,9 <i>S</i> ,10 <i>R</i> , <i>E</i> )-8,9-dihydroxy-2-oxo-10-propyl-3,4,5,8,9,10-hexahydro-2 <i>H</i> -oxecin-3-yl hexa-2,4-dienoate                                                                                                                            | <i>Stagonospora</i> , <i>Phoma</i> and <i>Ascochyta</i> spp | phytotoxicity | [93]    |
| Cytochalasins F (200)                                                                                             | cytochalasan                | (1 <i>E</i> ,4 <i>R</i> ,9 <i>E</i> ,12a <i>S</i> ,15 <i>S</i> ,16 <i>S</i> ,16a <i>R</i> ,17a <i>S</i> )-15-benzyl-4,16,16a-trimethyl-4,5,6,7,15,15a,16,16a-octahydro-3 <i>H</i> -[1]oxacyclotetradecino[2,3- <i>d</i> ]oxireno[2,3- <i>f</i> ]isindole-8,11,13(14 <i>H</i> ,17a <i>H</i> ,17b <i>H</i> )-trione | <i>Stagonospora</i> , <i>Phoma</i> and <i>Ascochyta</i> spp |               | [93]    |
| Cytochalasins T (201)                                                                                             | cytochalasan                | (3 <i>S</i> ,4 <i>S</i> ,7 <i>E</i> ,10 <i>R</i> ,14 <i>R</i> ,15 <i>E</i> ,18a <i>R</i> )-3-benzyl-14-hydroxy-4,5,10-trimethyl-2,3,3a,4,9,10,11,12,13,14-decahydro-1 <i>H</i> -[1]oxacyclotetradecino[2,3- <i>d</i> ]isindole-1,17(6a <i>H</i> )-dione                                                           | <i>Stagonospora</i> , <i>Phoma</i> and <i>Ascochyta</i> spp |               | [93]    |
| Cytochalasins Z1 (202)                                                                                            | cytochalasan                | (3 <i>S</i> ,4 <i>S</i> ,7 <i>E</i> ,10 <i>R</i> ,15 <i>E</i> ,18a <i>R</i> )-3-(4-hydroxybenzyl)-4,5,10-trimethyl-2,3,3a,4,9,10,11,12,13,14-decahydro-1 <i>H</i> -[1]oxacyclotetradecino[2,3- <i>d</i> ]isindole-1,17(6a <i>H</i> )-dione                                                                        | <i>Stagonospora</i> , <i>Phoma</i> and <i>Ascochyta</i> spp |               | [93]    |
| Cytochalasins Z2 (203)                                                                                            | cytochalasan                | (3 <i>S</i> ,4 <i>S</i> ,7 <i>E</i> ,10 <i>R</i> ,14 <i>R</i> ,15 <i>E</i> ,18a <i>R</i> )-3-benzyl-14-hydroxy-5-(hydroxymethyl)-4,10-dimethyl-                                                                                                                                                                   | <i>Stagonospora</i> , <i>Phoma</i> and <i>Ascochyta</i> spp |               | [93]    |



|                                                                    |                             |                                                                                                                                                                                                                                                                                                                                                                                                                                    |                                                             |  |         |
|--------------------------------------------------------------------|-----------------------------|------------------------------------------------------------------------------------------------------------------------------------------------------------------------------------------------------------------------------------------------------------------------------------------------------------------------------------------------------------------------------------------------------------------------------------|-------------------------------------------------------------|--|---------|
|                                                                    |                             | 2,3,3a,4,9,10,11,12,13,14-decahydro-1 <i>H</i> -[1]oxacyclotetradecino[2,3- <i>d</i> ]isoindole-1,17(6 <i>aH</i> )-dione                                                                                                                                                                                                                                                                                                           |                                                             |  |         |
| Cytochalasins Z3 (204)                                             | cytochalasan                | (3 <i>S</i> ,4 <i>S</i> ,6 <i>S</i> ,7 <i>E</i> ,10 <i>R</i> ,15 <i>E</i> ,18 <i>aS</i> )-3-benzyl-6,13-dihydroxy-4,10-dimethyl-5-methylene-3,3a,4,5,6,6a,9,10,11,12,13,14-dodecahydro-1 <i>H</i> -[1]oxacyclotetradecino[2,3- <i>d</i> ]isoindole-1,17(2 <i>H</i> )-dione                                                                                                                                                         | <i>Stagonospora</i> , <i>Phoma</i> and <i>Ascochyta</i> spp |  | [93]    |
| Agropyrenol (205)                                                  | substituted salicylaldehyde | 2-((3 <i>R</i> ,4 <i>R</i> , <i>E</i> )-3,4-dihydroxypent-1-en-1-yl)-6-hydroxybenzaldehyde                                                                                                                                                                                                                                                                                                                                         | <i>A. agropyrina</i> var. <i>nana</i>                       |  | [94,95] |
| Phomentrioloxin (206)                                              | cyclohex-5-ene-1,2,4-triol  | (1 <i>R</i> ,2 <i>R</i> ,3 <i>R</i> ,4 <i>R</i> )-3-methoxy-6-(7-methyl-3-methyleneoct-6-en-1-yn-1-yl)cyclohex-5-ene-1,2,4-triol                                                                                                                                                                                                                                                                                                   | <i>Phomopsis</i> sp.                                        |  | [96,97] |
| Fusicoccin (207)                                                   | diterpene                   | ( <i>S</i> )-2-((1 <i>S</i> ,4 <i>R</i> ,5 <i>R</i> ,6 <i>R</i> ,6 <i>aS</i> ,9 <i>S</i> ,10 <i>aR</i> , <i>E</i> )-4-(((2 <i>S</i> ,3 <i>R</i> ,4 <i>S</i> ,5 <i>R</i> ,6 <i>R</i> )-4-acetoxy-3,5-dihydroxy-6-(((2-methylbut-3-en-2-yl)oxy)methyl)tetrahydro-2 <i>H</i> -pyran-2-yl)oxy)-1,5-dihydroxy-9-(methoxymethyl)-6,10a-dimethyl-1,2,4,5,6,6a,7,8,9,10a-decahydrodicyclopenta[ <i>a,d</i> ][8]annulen-3-yl)propyl acetate | <i>Fusicoccum amygda</i>                                    |  | [2,101] |
| Dideacetylfusicoccin A (208)                                       | diterpene                   | (2 <i>S</i> ,3 <i>R</i> ,4 <i>S</i> ,5 <i>S</i> ,6 <i>R</i> )-2-(((1 <i>S</i> ,4 <i>R</i> ,5 <i>R</i> ,6 <i>R</i> ,6 <i>aS</i> ,9 <i>S</i> ,10 <i>aR</i> , <i>E</i> )-1,5-dihydroxy-3-(( <i>S</i> )-1-hydroxypropan-2-yl)-9-(methoxymethyl)-6,10a-dimethyl-1,2,4,5,6,6a,7,8,9,10a-decahydrodicyclopenta[ <i>a,d</i> ][8]annulen-4-yl)oxy)-6-(((2-methylbut-3-en-2-yl)oxy)methyl)tetrahydro-2 <i>H</i> -pyran-3,4,5-triol           | hemisynthesized from 207 for SAR studies                    |  | [2,101] |
| Isopropylidene derivative of fusicoccin aglycone (209)             | diterpene                   | (3 <i>aR</i> ,6 <i>S</i> ,6 <i>aR</i> ,8 <i>S</i> ,10 <i>aS</i> ,11 <i>R</i> ,11 <i>aR</i> , <i>E</i> )-4-(( <i>S</i> )-1-hydroxypropan-2-yl)-8-(methoxymethyl)-2,2,6a,11-tetramethyl-3a,5,6,6a,8,9,10,10a,11,11a-decahydrodicyclopenta[3,4:6,7]cycloocta[1,2- <i>d</i> ][1,3]dioxol-6-ol                                                                                                                                          | hemisynthesized from 207 for SAR studies                    |  | [2,101] |
| 16- <i>O</i> -Demethyl-de- <i>tert</i> -pentenylfusicoccin A (210) | diterpene                   | (2 <i>R</i> ,3 <i>S</i> ,4 <i>R</i> ,5 <i>R</i> ,6 <i>S</i> )-6-(((1 <i>S</i> ,4 <i>R</i> ,5 <i>R</i> ,6 <i>R</i> ,6 <i>aS</i> ,11 <i>aR</i> , <i>Z</i> )-1,5,9-triacetoxy-3-(( <i>S</i> )-1-acetoxypropan-2-yl)-6,11a-dimethyl-2,4,5,6,6a,7,8,9,10,11a-decahydro-1 <i>H</i> -benzo[ <i>a</i> ]cyclopenta[ <i>d</i> ][8]annulen-4-yl)oxy)tetrahydro-2 <i>H</i> -pyran-2,3,4,5-tetrayl tetraacetate                                 | hemisynthesized from 207 for SAR studies                    |  | [102]   |
| 16- <i>O</i> -Demethyl-de- <i>tert</i> -pentenylfusicoccin A (211) | diterpene                   | (2 <i>R</i> ,3 <i>R</i> ,4 <i>S</i> ,5 <i>R</i> ,6 <i>S</i> )-2-(acetoxymethyl)-6-(((1 <i>S</i> ,4 <i>R</i> ,5 <i>R</i> ,6 <i>R</i> ,6 <i>aS</i> ,11 <i>aR</i> , <i>Z</i> )-1,5-diacetoxy-3-(( <i>S</i> )-1-acetoxypropan-2-yl)-6,11a-dimethyl-2,4,5,6,6a,7,8,11a-octahydro-1 <i>H</i> -                                                                                                                                           | hemisynthesized from 207 for SAR studies                    |  | [102]   |

|                                |                         |                                                                                                            |                                        |               |           |
|--------------------------------|-------------------------|------------------------------------------------------------------------------------------------------------|----------------------------------------|---------------|-----------|
|                                |                         | benzo[a]cyclopenta[d][8]annulen-4-yl)oxy)tetrahydro-2H-pyran-3,4,5-triyl triacetate                        |                                        |               |           |
| Compound (212)                 | cyclohexanone           | (1S,2R,6S)-3-methoxy-5-oxo-7-oxabicyclo[4.1.0]hept-3-en-2-yl 5-azidopentanoate                             | hemisynthesized from 7 for SAR studies |               | [100]     |
| Compound (213)                 | cyclohexanone           | (1S,2R,6S)-3-methoxy-5-oxo-7-oxabicyclo[4.1.0]hept-3-en-2-yl 4-bromobenzoate                               | hemisynthesized from 7 for SAR studies |               | [100]     |
| Compound (214)                 | cyclohexanone           | (1S,2S,6S)-3-methoxy-5-oxo-7-oxabicyclo[4.1.0]hept-3-en-2-yl 5-azidopentanoate                             | hemisynthesized from 8 for SAR studies |               | [100]     |
| Compound (215)                 | cyclohexanone           | (1S,2S,5R,6R)-3-methoxy-7-oxabicyclo[4.1.0]hept-3-ene-2,5-diol                                             | hemisynthesized from 8 for SAR studies |               | [100]     |
| Cochliotoxin (216)             | dihydropyranopyrandione | (2S,3S)-3-hydroxy-2-methyl-7-(3-methyloxiran-2-yl)-2,3-dihydropyrano[4,3-b]pyran-4,5-dione                 | <i>Cochliobolus australiensis</i>      | phytotoxicity | [106–108] |
| Radicinin (217)                | dihydropyranopyrandione | (2S,3S)-3-hydroxy-2-methyl-7-((E)-prop-1-en-1-yl)-2,3-dihydropyrano[4,3-b]pyran-4,5-dione                  | <i>C. australiensis</i>                | phytotoxicity | [106–108] |
| 3- <i>epi</i> -Radicinin (218) | dihydropyranopyrandione | (2S,3R,4S)-3,4-dihydroxy-2-methyl-7-((E)-prop-1-en-1-yl)-3,4-dihydropyrano[4,3-b]pyran-5(2H)-one           | <i>C. australiensis</i>                | phytotoxicity | [106–108] |
| Radicinol (219)                | dihydropyranopyrandione | (2S,3R)-3-hydroxy-2-methyl-7-((E)-prop-1-en-1-yl)-2,3-dihydropyrano[4,3-b]pyran-4,5-dione                  | <i>C. australiensis</i>                |               | [106–108] |
| 3- <i>epi</i> -Radicinol (220) | dihydropyranopyrandione | (2S,3S,4S)-3,4-dihydroxy-2-methyl-7-((E)-prop-1-en-1-yl)-3,4-dihydropyrano[4,3-b]pyran-5(2H)-one           | <i>C. australiensis</i>                |               | [106–108] |
| Chloromonilinic acid B (221)   | chromanonacrylic acid   | (E)-3-chloro-3-(5-hydroxy-3-(2-methoxy-2-oxoethyl)-7-methyl-4-oxo-4H-chromen-2-yl)acrylic acid             | <i>C. australiensis</i>                | phytotoxicity | [106–108] |
| Chloromonilinic acids C (222)  | chromanonacrylic acid   | (S,E)-3-chloro-3-(5-hydroxy-3-(1-hydroxy-2-methoxy-2-oxoethyl)-7-methyl-4-oxo-4H-chromen-2-yl)acrylic acid | <i>C. australiensis</i>                | phytotoxicity | [106–108] |
| Chloromonilinic acids D (223)  | chromanonacrylic acid   | (Z)-3-chloro-3-(5-hydroxy-3-(2-methoxy-2-oxoethyl)-7-methyl-4-oxo-4H-chromen-2-yl)acrylic acid             | <i>C. australiensis</i>                | phytotoxicity | [106–108] |
| Chloromonilicin (224)          | oxepinochromene         | (S)-methyl 5-chloro-10-hydroxy-8-methyl-3,11-dioxo-3,11-dihydro-1H-oxepino[4,3-b]chromene-1-carboxylate    | <i>C. australiensis</i>                | phytotoxicity | [106–108] |
